# Supplementary material for: Persistence of High Levels of Serum Complement C5a in Severe COVID-19 Cases After Hospital Discharge
Source: Frontiers journal article supplement (doi:10.3389/fimmu.2021.767376), 2021-11-18
Supplement: Data_Sheet_2.PDF [file Data_Sheet_2.PDF]

## **SUPPLEMENTARY METHODS**

### **C5a quantification**

Luminex magnetic microspheres were coated with the capture anti-C5a antibody provided in the Human Complement Component C5a DuoSet ELISA kit (DY2037, RD Systems). Luminex MagPlex microspheres (region 12, MC10012-01, Luminex) compatible with Magpix instrument were used. The xMAP Antibody Coupling (AbC) kit (40-50016, Luminex) was used to covalently couple the anti-C5a antibody to 12.5 million carboxylated magnetic beads. Magnetic beads were stored protected from light at 4°C.

Serum samples from patients were diluted 1:20 for a total volume of 50 µl using working buffer (PBS supplemented with 1% BSA and 0.05% sodium azide). Washing buffer contained PBS + 0.05% Tween 20. All incubations were performed at room temperature in a 96-well plate (Greiner Bio-One 655096) protected from light. Fifty µl of beads, standards and samples were mixed and incubated for 2 hours at RT. Afterwards, the plate was attached to a magnetic plate for 2 minutes and washed. This step was repeated twice. The detection antibody against C5a (from the Human Complement Component C5a DuoSet ELISA kit) was diluted in working buffer 1:1,000 and 100 µl were dispensed per well. Streptavidin-PE was added in the same proportion (1:1) after one-hour. In the last step, magnetic microspheres were resuspended in 150 µl of working buffer by shaking 5 min at 700 rpm. Mean fluorescence intensity (MFI) per sample was determined in a Magpix instrument with xPONENT software (Settings: Type of analysis = None). MFIs were transformed into concentration values (ng/ml) by using a reference curve obtained with the C5a standard provided in the R&D kit. Inner controls between plates were used to calculate a correlation factor applied to data normalization.

### **C5b-9 quantification**

ELISA plates (Maxisorp, Nunc) were coated with 5 µg/ml of mouse monoclonal anti-C5b-9 neoepitope antibody (clone ae11, Hycult) overnight in PBS buffer at 4°C, and blocked with 1% fish gelatin solution (Sigma Aldrich) in washing buffer (20 mM Tris, 140 mM NaCl, 0.2% Tween 20) for 1 hour at room temperature. Serum samples were diluted 1:40 in working buffer (PBS supplemented with 0.2% Tween 20 and 20 mM EDTA), and added to the plate. The standard curve was prepared from purified C5b-9 complex (Complement Technology) diluted in 1:40 normal human serum in working solution. After 1 h incubation at 4°C, plates were washed, incubated for 45 min at 37°C with a rabbit anti-C5b-9 neo polyclonal antibody (Complement Technology) diluted 1:5,000 in PBS + 0.2% Tween 20, followed by washing and 30 min incubation with 1:2,500 dilution of goat-anti-rabbit HRP conjugate (Jackson Laboratory). The assay was developed with TMB solution (Sigma) and stopped with 0.5 M H<sub>2</sub>SO<sub>4</sub>. Absorbance at 450 nm was measured with Synergy H1 reader (BioTek), and C5b9 concentration in samples vs. the standard curve was determined using GraphPad Prism software.

### **Routine laboratory tests and cytokine determinations**

Routine laboratory parameters (LDH, ferritin, D-dimer, CRP and troponin T) and cytokines (IFN $\gamma$  and IL1 $\alpha$ ) were determined following standard procedures at the Department of Clinical Chemistry, Clínica Universidad de Navarra, Pamplona, Spain.
